# Supplementary material for: Investigating the effects of copy number variants on reading and language performance
Source: J Neurodev Disord. 2016 May 15;8:17. doi: 10.1186/s11689-016-9147-8 (PMC4868026; doi:10.1186/s11689-016-9147-8)
Supplement: Additional file 2: — CNV calls of interest. Large CNV calls; CNVs shared between two or more affected co-siblings (extended tables); CNV calls within genes implicated in reading and language; CNV calls overlapping genes implicated in reading and/or language impairments by previous CNV studies; CNV calls overlapping common neuropsychiatric CNVs; CNV calls annotated to ZNF737. (XLSX 41 kb) [file 11689_2016_9147_MOESM2_ESM.xlsx]

## Sheet: TableS2a
Subject	Family	Sex	Subset	Chr	Start (bp)	End (bp)	Start (SNP)	End (SNP)	SNPs	Length (bp)	CopyN	Confidence	Frequency	Gene	PC1	IQadjPC1	IBGdiscr		Tables S2a. Large annotated CNV events (>500 kb) detected in RD cases.
IBG111948	3523	2	RD	16	14975292	16303388	rs4780563	rs8059511	419	1328097	3	762.041	common	ABCC1,ABCC6,C16orf45,FOPNL,KIAA0430,LOC100288162,MIR3179-1,MIR3179-2,MIR3179-3,MIR3180-1,MIR3180-2,MIR3180-3,MIR3180-4,MIR484,MIR6506,MIR6511A-2,MIR6511B-1,MIR6770-2,MPV17L,MYH11,NDE1,NOMO1,NPIPA1,NPIPA5,NTAN1,PDXDC1,RRN3	-1.55297	-1.52509	-1.61194			All the positions are expressed in hg 19 coordinates.
IBG145160	4499	2	RD	11	54794237	56003589	rs34944111	rs10896138	190	1209353	3	390.842	common	OR10AG1,OR4A15,OR4A16,OR4C11,OR4C15,OR4C16,OR4C6,OR4P4,OR4S2,OR5AS1,OR5D13,OR5D14,OR5D16,OR5D18,OR5F1,OR5I1,OR5J2,OR5L1,OR5L2,OR5T2,OR5W2,OR7E5P,OR8H2,OR8H3,OR8I2,OR8J3,OR8K5,TRIM48,TRIM51,TRIM51HP	-2.21301	-2.04972	-3.63341			All the CNVs partially overlapped or encompassed the genes to which they were annotated.
IBG1451651	4499	1	RD	11	54794237	56003589	rs34944111	rs10896138	190	1209353	3	551.246	common	OR10AG1,OR4A15,OR4A16,OR4C11,OR4C15,OR4C16,OR4C6,OR4P4,OR4S2,OR5AS1,OR5D13,OR5D14,OR5D16,OR5D18,OR5F1,OR5I1,OR5J2,OR5L1,OR5L2,OR5T2,OR5W2,OR7E5P,OR8H2,OR8H3,OR8I2,OR8J3,OR8K5,TRIM48,TRIM51,TRIM51HP	-1.82646	-1.74442	-2.14309			The frequency column specifies how each CNV call showed substantial overlaps (≥ 50% of its length) with any CNV reported in the DGV database (July 2013, hg19): ≥ 5 overlaps for common CNVs, < 5 overlaps for rare CNVs.
IBG112389	4048	1	RD	5	45671667	46399093	rs10074312	rs7293455	35	727427	3	140.151	common	HCN1	-1.4669	-1.57443	-3.18378
IBG112079	3906	1	RD	8	105736976	106406847	rs16871764	rs988260	147	669872	3	617.503	rare	ZFPM2	-1.56465	-1.6451	-1.97767
IBG143577	4010	1	RD	2	132731387	133353827	rs4063769	rs16837705	120	622441	3	266.835	common	ANKRD30BL,GPR39,MIR663B	-1.73151	-1.54114	-2.09164
IBG1448951	4442	1	RD	14	19847604	20420338	rs1925982	rs3898026	17	572735	3	54.036	common	BMS1P17,BMS1P18,OR11H2,OR4K1,OR4K2,OR4K5,OR4M1,OR4N2,OR4Q3,POTEM	-0.97135	-1.0518	-2.8309
IBG112039	3576	1	RD	11	48397233	48942781	rs7482080	rs12293923	33	545549	1	139.386	common	OR4A47	-0.59151	-0.42822	-1.75988
IBG143157	3914	1	RD	2	96195730	96737083	rs1364394	rs2579552	26	541354	3	86.013	common	FAHD2CP,GPAT2,LINC00342,TRIM43	-2.51205	-2.5925	-3.29317
IBG111829	2856	1	RD	11	49770268	50282774	rs7106742	rs10901911	44	512507	3	155.848	common	LOC440040,LOC441601,OR4C12,OR4C13	-1.92727	-1.7369	-2.78277

## Sheet: TableS2b
Subject	Family	Siblings	Cases	Subset	Sex	Chr	Start (bp)	End (bp)	Start (SNP)	End (SNP)	SNPs	Length (bp)	CopyN	Confidence	Frequency	Gene	PC1	IQadjPC1	IBGdiscr		Tables S2b. Annotated CNVs shared between two or more affected co-siblings in ten families presenting more than one RD case, which were not detected in any unaffected participants.
IBG145160	4499	3	2	RD	2	11	54794237	56003589	rs34944111	rs10896138	190	1209353	3	390.842	common	OR10AG1,OR4A15,OR4A16,OR4C11,OR4C15,OR4C16,OR4C6,OR4P4,OR4S2,OR5AS1,OR5D13,OR5D14,OR5D16,OR5D18,OR5F1,OR5I1,OR5J2,OR5L1,OR5L2,OR5T2,OR5W2,OR7E5P,OR8H2,OR8H3,OR8I2,OR8J3,OR8K5,TRIM48,TRIM51,TRIM51HP	-2.21301	-2.04972	-3.63341			All the positions are expressed in hg 19 coordinates.
IBG1451651	4499	3	2	RD	1	11	54794237	56003589	rs34944111	rs10896138	190	1209353	3	551.246	common	OR10AG1,OR4A15,OR4A16,OR4C11,OR4C15,OR4C16,OR4C6,OR4P4,OR4S2,OR5AS1,OR5D13,OR5D14,OR5D16,OR5D18,OR5F1,OR5I1,OR5J2,OR5L1,OR5L2,OR5T2,OR5W2,OR7E5P,OR8H2,OR8H3,OR8I2,OR8J3,OR8K5,TRIM48,TRIM51,TRIM51HP	-1.82646	-1.74442	-2.14309			All the CNVs partially overlapped or encompassed the genes to which they were annotated.
IBG142799	3514	2	2	RD	1	6	145148111	145174832	rs2297846	rs9390238	15	26722	3	29.649	rare	UTRN	-1.62216	-1.35054	-2.12388			The frequency column specifies how each CNV call showed substantial overlaps (≥ 50% of its length) with any CNV reported in the DGV database (July 2013, hg19): ≥ 5 overlaps for common CNVs, < 5 overlaps for rare CNVs.
IBG142797	3514	2	2	RD	1	6	145148111	145174832	rs2297846	rs9390238	15	26722	3	29.372	rare	UTRN	-1.83743	-1.99913	-1.6636
IBG142799	3514	2	2	RD	1	1	225391396	225454386	rs9803691	rs4653415	14	62991	3	37.092	common	DNAH14	-1.62216	-1.35054	-2.12388
IBG142797	3514	2	2	RD	1	1	225391396	225454386	rs9803691	rs4653415	14	62991	3	39.138	common	DNAH14	-1.83743	-1.99913	-1.6636

## Sheet: TableS2c
Subject	Family	Sex	Subset	Chr	Start (bp)	End (bp)	Start (SNP)	End (SNP)	SNPs	Length (bp)	CopyN	Confidence	Gene	PC1	IQadjPC1	IBGdiscr			Tables S2c. CNVs annotated to candidate susceptibility genes implicated in reading and language traits by previous literature.
IBG143577	4010	1	RD	15	55605152	55708191	rs11636687	rs11635187	20	103040	3	27.582	C15orf65,CCPG1,DYX1C1-CCPG1,MIR628,PIGB	-1.73151	-1.54114	-2.09164				All the positions are expressed in hg 19 coordinates.
IBG143579	4010	1	RD	15	55605152	55768094	rs11636687	rs2447713	27	162943	3	96.966	C15orf65,CCPG1,DYX1C1,DYX1C1-CCPG1,MIR628,PIGB	-0.85665	-0.58503	-1.0803				All the CNVs partially overlapped or encompassed the genes to which they were annotated.
IBG145109	4489	1	RD	7	146219369	146389259	rs17170124	rs2642483	36	169891	1	170.947	CNTNAP2	0.27847	0.52301	0.08764

## Sheet: TableS2d
Subject	Family	Sex	Subset	Chr	Start (bp)	End (bp)	Start (SNP)	End (SNP)	SNPs	Length (bp)	CopyN	Confidence	Gene	PC1	IQadjPC1	IBGdiscr			Tables S2d.CNVs annotated to genes in which suggestive associations have been detected in previous GWAS studies of reading and language skills.
IBG144267	4209	1	RD	22	36161754	36342390	rs9622282	rs2157258	20	180637	1	14.648	RBFOX2	0.24796	0.14043	0.6893				All the positions are expressed in hg 19 coordinates.
IBG142597	3002	1	RD	19	1376723	1481481	rs266805	rs1047854	34	104759	1	15.363	APC2,C19orf25,DAZAP1,GAMT,MUM1,NDUFS7,PCSK4,RPS15	-0.3662	-0.41956	-0.5389				All the CNVs partially overlapped or encompassed the genes to which they were annotated.
IBG113688	5566	2	RD	19	1388320	1429367	rs7254913	rs12975794	14	41048	3	14.419	DAZAP1,GAMT,NDUFS7	0.81568	1.24979	-0.32113
IBG142178	2526	2	RD	19	1424888	1520582	rs698748	rs2332497	39	95695	1	14.58	ADAMTSL5,APC2,C19orf25,DAZAP1,PCSK4,REEP6,RPS15	0.26775	0.10605	-0.08323

## Sheet: TableS2e
Subject	Family	Sex	Subset	Chr	Start (bp)	End (bp)	Start (SNP)	End (SNP)	SNPs	Length (bp)	CopyN	Confidence	Gene (distance)a	PC1	IQadjPC1	IBGdiscr	Studyb		Tables S2e. CNVs annotated to genes implicated in reading and/or language impairments by previous CNV studies.
IBG145360	4646	2	ADHD	7	110543241	110591124	rs258989	rs10252992	12	47884	3	20.25	IMMP2L	-0.18193	-0.14705	0.12281	[20, 25]			All the positions are expressed in hg 19 coordinates.
IBG1453652	4646	1	ADHD	7	110548594	110591124	rs258996	rs10252992	10	42531	3	20.688	IMMP2L	-0.00153	-0.15207	2.17489	[20, 25]			a When CNVs do not overlap with transcripts but are located within 50 kb from the 5'- and 3'-UTRs of genes, distance of annotation from these genes is reported in bp in brackets.
IBG112228	3960	2	RD	7	110768595	110895375	rs10216191	rs17539223	27	126781	1	131.654	IMMP2L	0.93917	0.34416	1.50232	[20, 25]			b Original CNV study implicating the gene in reading and language (see main text for full references): [20] = Pagnamenta et al. (2010); [25] = Girirajan et al. (2011); [17] = Veerappa et al. (2013a); [18] = Veerappa et al. (2013b); [23] = Simpson et al. (2015); [24] = Pettigrew et al. (2015).
IBG113288	4858	2	ADHD	7	110827173	110939653	rs769130	rs253376	26	112481	3	46.168	IMMP2L	1.13921	1.0561	2.55981	[20, 25]
IBG113289	4858	1	ADHD	7	110827173	110939653	rs769130	rs253376	26	112481	3	26.445	IMMP2L	1.31272	1.41502	1.50362	[20, 25]
IBG1130861	4485	2	ADHD	7	110840236	110931475	rs214454	rs37757	19	91240	1	74.932	IMMP2L	-0.70691	-0.3012	0.62165	[20, 25]
IBG113089	4485	1	ADHD	7	110879251	110932630	rs37715	rs10240810	12	53380	1	28.345	IMMP2L	0.13776	0.30748	1.66863	[20, 25]
IBG112249	3980	1	RD	7	110986897	111166165	rs17443228	rs4730488	28	179269	1	102.325	IMMP2L	0.17091	0.22587	-0.02504	[20, 25]
IBG113709	5478	1	RD	7	111053822	111199771	rs10267546	rs12705779	20	145950	1	106.25	IMMP2L	-1.50122	-1.44626	-1.17758	[20, 25]
IBG112148	3937	2	RD	7	111053822	111199771	rs10267546	rs12705779	20	145950	1	85.246	IMMP2L	0.76524	0.71187	0.99904	[20, 25]
IBG112149	3937	1	RD	7	111053822	111199771	rs10267546	rs12705779	20	145950	1	92.585	IMMP2L	1.20232	1.14895	1.83274	[20, 25]
IBG111229	1631	1	RD	7	111108260	111183610	rs10258236	rs2613588	13	75351	1	36.25	IMMP2L	1.32216	1.13338	1.23754	[20, 25]
IBG111228	1631	2	RD	7	111122474	111183610	rs1558078	rs2613588	11	61137	1	25.817	IMMP2L	-	-	1.9589	[20, 25]
IBG113569	5413	1	ADHD	7	111146186	111235377	rs6967064	rs2254006	17	89192	1	22.482	IMMP2L	-2.06127	-1.9084	-1.15031	[20, 25]
IBG113409	5189	1	RD	7	111199771	111278445	rs12705779	rs11978935	14	78675	3	35.796	IMMP2L	-0.57332	-0.32879	-1.38696	[20, 25]
IBG1128352	4344	1	ADHD	7	111235377	111288373	rs2254006	rs2613607	12	52997	1	39.253	IMMP2L(32804)	-	-	-	[20, 25]
IBG1128351	4344	1	ADHD	7	111235377	111288373	rs2254006	rs2613607	12	52997	1	48.391	IMMP2L(32804)	-	-	-	[20, 25]
IBG1443551	4214	1	RD	1	71902018	71969514	rs7519228	rs357200	18	67497	3	31.522	NEGR1	1.44752	1.39415	2.87339	[17]
IBG111949	3523	1	RD	1	72455331	72495217	rs11802650	rs12403024	13	39887	1	14.467	NEGR1	1.45937	1.1081	1.53001	[17]
IBG145109	4489	1	RD	7	146219369	146389259	rs17170124	rs2642483	36	169891	1	170.947	CNTNAP2	0.27847	0.52301	0.08764	[17]
IBG1452151	4509	1	RD	X	91752101	92357401	rs5984967	rs1854090	24	605301	2	30.021	PCDH11X	0.42269	0.26099	1.27058	[18, 23]
IBG1115051	2142	1	RD	X	91783608	92277171	rs2364526	rs5939945	18	493564	2	12.722	PCDH11X	1.00308	0.76014	1.17428	[18, 23]
IBG111999	3541	1	RD	X	91870395	92357401	rs4020563	rs1854090	18	487007	2	20.697	PCDH11X	0.37344	0.37423	0.33288	[18, 23]
IBG141417	2153	1	RD	X	91899552	92249593	rs2751415	rs2365839	12	350042	2	12.082	PCDH11X(21324)	-1.84286	-2.49204	-2.59773	[18, 23]
IBG141817	2277	1	RD	X	91899552	92249593	rs2751415	rs2365839	12	350042	2	14.464	PCDH11X(21324)	-1.63905	-1.74658	-2.16784	[18, 23]
IBG1122551	3984	1	RD	X	91899552	92277171	rs2751415	rs5939945	14	377620	2	12.919	PCDH11X(21324)	1.97031	1.23989	3.45487	[18, 23]
IBG1448751	4433	1	RD	X	91899552	92357401	rs2751415	rs1854090	17	457850	2	16.706	PCDH11X(21324)	0.07753	0.29498	0.78232	[18, 23]
IBG1434861	3996	2	ADHD	5	148869227	148893185	rs10039868	rs2125130	13	23959	1	14.526	CSNK1A1	0.80189	0.70192	1.958	[23]
IBG112748	4324	2	RD	5	148873854	148903068	rs10057083	rs10071773	11	29215	3	13.84	CSNK1A1	-	-	-0.44832	[23]
IBG145349	4644	1	RD	5	148873854	148914158	rs10057083	rs7730207	12	40305	3	16.021	CSNK1A1	-0.7644	-0.79069	-0.95462	[23]
IBG142519	2877	1	RD	11	122455520	122675120	rs11218700	rs12576782	103	219601	3	309.944	UBASH3B	0.76208	0.81705	1.85824	[23]
IBG142517	2877	1	RD	11	122455520	122675193	rs11218700	rs12287912	104	219674	3	394.724	UBASH3B	-0.46787	0.07457	-1.24319	[23]
IBG1425151	2877	1	RD	11	122462580	122670390	rs7103440	rs873590	97	207811	3	277.109	UBASH3B	-0.00082	0.05415	-0.25983	[23]
IBG113349	4965	1	RD	8	10024748	10121022	rs4255142	rs9650649	63	96275	1	223.894	MSRA	0.07101	0.36972	0.45819	[23]
IBG113668	5475	2	ADHD	7	81960231	82453708	rs42236	rs2522833	157	493478	3	506.54	CACNA2D1,PCLO	0.9571	1.0594	0.7599	[23]
IBG143358	3962	2	RD	2	98653406	98755252	rs11898149	rs7559678	21	101847	3	113.787	VWA3B	-0.69241	-0.36662	-0.06572	[23]
IBG143350	3962	2	RD	2	98653406	98758847	rs11898149	rs13396689	22	105442	3	90.319	VWA3B	0.27572	0.27652	1.35256	[23]
IBG1122361	3982	2	RD	X	35946416	36451754	rs6527521	rs7058734	49	505339	3	26.052	CHDC2,CXorf22,CXorf30,LOC101928564	0.61354	0.45184	0.99289	[23]
IBG142188	2691	2	RD	22	18886915	21463730	rs2870978	rs2845421	751	2576816	3	165.935	AIFM3,ARVCF,BCRP2,C22orf29,C22orf39,CDC45,CLDN5,CLTCL1,COMT,CRKL,DGCR10,DGCR11,DGCR14,DGCR2,DGCR5,DGCR6,DGCR6L,DGCR8,DGCR9,GNB1L,GP1BB,GSC2,HIRA,KLHL22,LINC00895,LINC00896,LOC100652736,LOC284865,LOC388849,LOC400891,LOC729444,LZTR1,MED15,MIR1286,MIR1306,MIR185,MIR3618,MIR4761,MIR6816,MRPL40,P2RX6,P2RX6P,PI4KA,PI4KAP1,POM121L4P,PRODH,RANBP1,RIMBP3,RTN4R,SCARF2,SEPT5,SEPT5-GP1BB,SERPIND1,SLC25A1,SLC…	0.16227	0.21723	-0.10303	[23]
IBG145848	5474	2	RD	15	31963721	32514341	rs1962098	rs2611583	109	550621	1	292.723	CHRNA7	-0.01064	0.64013	-0.35747	[24]
IBG142928	3548	2	RD	15	32018731	32514341	rs4779919	rs2611583	108	495611	3	428.258	CHRNA7	-0.12716	-0.37011	-0.02526	[24]
IBG143639	4032	1	RD	15	32018731	32514341	rs4779919	rs2611583	108	495611	3	450.473	CHRNA7	0.87233	0.43981	1.80455	[24]
IBG1429261	3548	2	RD	15	32018731	32514341	rs4779919	rs2611583	108	495611	3	251.029	CHRNA7	1.27048	0.70255	2.3074	[24]
IBG142920	3548	2	RD	15	32019919	32514341	rs10459623	rs2611583	107	494423	3	393.63	CHRNA7	1.46879	1.76749	1.11554	[24]
IBG112739	4309	1	RD	15	32019919	32514341	rs10459623	rs2611583	107	494423	3	395.031	CHRNA7	-	-	2.68589	[24]
IBG1443551	4214	1	RD	15	32049125	32514341	rs17762839	rs2611583	103	465217	3	405.559	CHRNA7	1.44752	1.39415	2.87339	[24]
IBG142478	2862	2	RD	15	32061439	32514341	rs11632840	rs2611583	100	452903	3	310.84	CHRNA7	0.34374	0.07371	1.23036	[24]
IBG113029	4478	1	RD	15	32380064	32514341	rs1399190	rs2611583	25	134278	3	21.792	CHRNA7	0.24395	0.24475	0.75412	[24]
IBG113028	4478	2	RD	15	32380064	32514341	rs1399190	rs2611583	25	134278	3	65.266	CHRNA7	1.21382	0.80838	2.16711	[24]

## Sheet: TableS2f
Subject	Family	Sex	Subset	Chr	Start (bp)	End (bp)	Start (SNP)	End (SNP)	SNPs	Length (bp)	CopyN	Confidence	Gene	PC1	IQadjPC1	IBGdiscr	Region (disorders associated)a			Tables S2f. Annotated CNVs which showed large/complete overlap with canonical neuropsychiatric CNVs assessed by Stefansson et al., 2014
IBG1128352	4344	1	ADHD	15	22750305	23272733	rs9330233	rs12906889	113	522429	3	272.8	CYFIP1,GOLGA8I,LOC283683,NIPA1,NIPA2,TUBGCP5,WHAMMP3	-	-	-	15q11.2 is a susceptibility region for several neurological dysfunctions, including language delays; CNVs in this region are also associated with SCZ				All the positions are expressed in hg 19 coordinates.
IBG112838	4344	2	ADHD	15	22750305	23272733	rs9330233	rs12906889	113	522429	3	394.667	CYFIP1,GOLGA8I,LOC283683,NIPA1,NIPA2,TUBGCP5,WHAMMP3	-	-	-	15q11.2 is a susceptibility region for several neurological dysfunctions, including language delays; CNVs in this region are also associated with SCZ				All the CNVs partially overlapped or encompassed the genes to which they were annotated.
IBG112839	4344	1	ADHD	15	22750305	23272733	rs9330233	rs12906889	113	522429	3	345.19	CYFIP1,GOLGA8I,LOC283683,NIPA1,NIPA2,TUBGCP5,WHAMMP3	-	-	-	15q11.2 is a susceptibility region for several neurological dysfunctions, including language delays; CNVs in this region are also associated with SCZ				a Abbreviations for disorders: SCZ = schizophrenia, DD = Developmental Delay, ID = Intellectual Disability, ASD = Autism Spectrum Disorders.
IBG1128351	4344	1	ADHD	15	22750305	23272733	rs9330233	rs12906889	113	522429	3	400.565	CYFIP1,GOLGA8I,LOC283683,NIPA1,NIPA2,TUBGCP5,WHAMMP3	-	-	-	15q11.2 is a susceptibility region for several neurological dysfunctions, including language delays; CNVs in this region are also associated with SCZ
IBG113439	5247	1	ADHD	16	29595483	30198151	rs4541091	rs1132812	116	602669	3	485.542	ALDOA,ASPHD1,C16orf54,C16orf92,CDIPT,CDIPT-AS1,CORO1A,DOC2A,FAM57B,GDPD3,HIRIP3,INO80E,KCTD13,KIF22,MAPK3,MAZ,MVP,PAGR1,PPP4C,PRRT2,QPRT,SEZ6L2,SLC7A5P1,SPN,TAOK2,TBX6,TMEM219,YPEL3,ZG16	0.54765	0.97022	1.7618	Duplications/deletions in 16p11.2 (29.5-30.2 Mb) are involved in DD, ASD, ID and SCZ
IBG143568	4013	2	RD	17	14101029	15345340	rs2856177	rs6502450	617	1244312	3	2378.35	CDRT15,CDRT4,CDRT7,CDRT8,COX10,HS3ST3B1,MGC12916,MIR4731,PMP22,TEKT3,TVP23C-CDRT4	0.23834	0.72662	-0.18199	Deletions in 17p12 are involved in ASD and SCZ
IBG145109	4489	1	RD	16	14929725	16303388	rs13380583	rs8059511	420	1373664	3	1109.68	ABCC1,ABCC6,C16orf45,FOPNL,KIAA0430,LOC100288162,MIR3179-1,MIR3179-2,MIR3179-3,MIR3180-1,MIR3180-2,MIR3180-3,MIR3180-4,MIR484,MIR6506,MIR6511A-2,MIR6511B-1,MIR6770-2,MPV17L,MYH11,NDE1,NOMO1,NPIPA1,NPIPA5,NTAN1,PDXDC1,RRN3	0.27847	0.52301	0.08764	Duplications/deletions in 16p13.11 are involved in DD, ASD and SCZ
IBG111948	3523	2	RD	16	14975292	16303388	rs4780563	rs8059511	419	1328097	3	762.041	ABCC1,ABCC6,C16orf45,FOPNL,KIAA0430,LOC100288162,MIR3179-1,MIR3179-2,MIR3179-3,MIR3180-1,MIR3180-2,MIR3180-3,MIR3180-4,MIR484,MIR6506,MIR6511A-2,MIR6511B-1,MIR6770-2,MPV17L,MYH11,NDE1,NOMO1,NPIPA1,NPIPA5,NTAN1,PDXDC1,RRN3	-1.55297	-1.52509	-1.61194	Duplications/deletions in 16p13.11 are involved in DD, ASD and SCZ
IBG142188	2691	2	RD	22	18886915	21463730	rs2870978	rs2845421	751	2576816	3	165.935	AIFM3,ARVCF,BCRP2,C22orf29,C22orf39,CDC45,CLDN5,CLTCL1,COMT,CRKL,DGCR10,DGCR11,DGCR14,DGCR2,DGCR5,DGCR6,DGCR6L,DGCR8,DGCR9,GNB1L,GP1BB,GSC2,HIRA,KLHL22,LINC00895,LINC00896,LOC100652736,LOC284865,LOC388849,LOC400891,LOC729444,LZTR1,MED15,MIR1286,MIR1306,MIR185,MIR3618,MIR4761,MIR6816,MRPL40,P2RX6,P2RX6P,PI4KA,PI4KAP1,POM121L4P,PRODH,RANBP1,RIMBP3,RTN4R,SCARF2,SEPT5,SEPT5-GP1BB,SERPIND1,SLC25A1,SLC…	0.16227	0.21723	-0.10303	22q11.21 is a critical region of Digeorge Syndrome; deletions in this region are also implicated in SCZ

## Sheet: TableS2g
Subject	Family	Sex	Subset	Chr	Start (bp)	End (bp)	Start (SNP)	End (SNP)	SNPs	Length (bp)	CopyN	Confidence	Gene (distance)a	PC1	IQadjPC1	IBGdiscr		Tables S2g. CNV calls annotated to ZNF737 (19p12).
IBG143618	4021	2	RD	19	20626179	20707568	rs12610629	rs4809062	12	81390	1	25.559	ZNF737(13230)	-0.8371	-0.5384	-1.48329			All the positions are expressed in hg 19 coordinates.
IBG113528	5374	2	ADHD	19	20626179	20707568	rs12610629	rs4809062	12	81390	1	51.79	ZNF737(13230)	-0.48216	-0.37986	1.67001			a When CNVs do not overlap with the transcript but are located within 50 kb from the 5'- and 3'-UTRs of ZNF737, distance of annotation from the gene is reported in bp in brackets.
IBG112919	4418	1	RD	19	20626179	20707568	rs12610629	rs4809062	12	81390	1	32.749	ZNF737(13230)	-0.37382	0.11446	-0.20161
IBG112599	4197	1	RD	19	20626179	20707568	rs12610629	rs4809062	12	81390	1	37.066	ZNF737(13230)	-0.32216	0.00362	-1.07653
IBG144330	4216	2	RD	19	20626179	20707568	rs12610629	rs4809062	12	81390	1	50.174	ZNF737(13230)	-0.266	-0.23812	0.10707
IBG143388	3972	2	RD	19	20626179	20707568	rs12610629	rs4809062	12	81390	1	39.725	ZNF737(13230)	-0.03571	-0.08908	-0.36946
IBG144319	4213	1	RD	19	20626179	20707568	rs12610629	rs4809062	12	81390	1	49.573	ZNF737(13230)	0.50023	0.6906	1.0259
IBG1439261	4147	2	RD	19	20626179	20707568	rs12610629	rs4809062	12	81390	1	54.511	ZNF737(13230)	0.78743	0.2195	1.98803
IBG112088	3904	2	RD	19	20626179	20707568	rs12610629	rs4809062	12	81390	1	32.46	ZNF737(13230)	1.79699	1.09365	1.75783
IBG140227	1200	1	RD	19	20626179	20715228	rs12610629	rs33948	13	89050	1	38.318	ZNF737(5570)	-1.77719	-1.45141	-2.99835
IBG112528	4167	2	RD	19	20626179	20715228	rs12610629	rs33948	13	89050	1	51.97	ZNF737(5570)	-1.40189	-1.48234	-1.37742
IBG142457	2867	1	RD	19	20626179	20715228	rs12610629	rs33948	13	89050	1	36.782	ZNF737(5570)	-1.18709	-0.86131	-1.28066
IBG1449162	4445	2	RD	19	20626179	20715228	rs12610629	rs33948	13	89050	1	52.487	ZNF737(5570)	-1.11443	-1.14071	-1.6259
IBG142789	3518	1	RD	19	20626179	20715228	rs12610629	rs33948	13	89050	1	39.86	ZNF737(5570)	-1.09198	-1.25368	-0.85498
IBG1448951	4442	1	RD	19	20626179	20715228	rs12610629	rs33948	13	89050	1	58.261	ZNF737(5570)	-0.97135	-1.0518	-2.8309
IBG141237	1685	1	RD	19	20626179	20715228	rs12610629	rs33948	13	89050	1	34.83	ZNF737(5570)	-0.95133	-1.05887	-1.53278
IBG144917	4445	1	RD	19	20626179	20715228	rs12610629	rs33948	13	89050	1	37.261	ZNF737(5570)	-0.91324	-0.58746	-1.0994
IBG1453351	4657	1	RD	19	20626179	20715228	rs12610629	rs33948	13	89050	1	57.927	ZNF737(5570)	-0.89242	-1.13536	-1.27724
IBG142290	2690	2	RD	19	20626179	20715228	rs12610629	rs33948	13	89050	1	33.174	ZNF737(5570)	-0.80803	-0.69891	-1.19063
IBG144478	4255	2	RD	19	20626179	20715228	rs12610629	rs33948	13	89050	1	16.45	ZNF737(5570)	-0.73768	-0.92646	-0.41819
IBG145717	5275	1	RD	19	20626179	20715228	rs12610629	rs33948	13	89050	1	34.233	ZNF737(5570)	-0.73065	-0.72985	-1.05654
IBG1117652	2799	1	RD	19	20626179	20715228	rs12610629	rs33948	13	89050	1	35.959	ZNF737(5570)	-0.70378	-0.97381	-0.41827
IBG1125761	4183	2	ADHD	19	20626179	20715228	rs12610629	rs33948	13	89050	1	67.51	ZNF737(5570)	-0.69127	-0.52155	0.6056
IBG1448861	4436	2	RD	19	20626179	20715228	rs12610629	rs33948	13	89050	1	47.454	ZNF737(5570)	-0.69108	-0.44654	-0.80498
IBG144447	4239	1	RD	19	20626179	20715228	rs12610629	rs33948	13	89050	1	38.021	ZNF737(5570)	-0.57912	-0.28042	-1.2146
IBG1453651	4646	1	ADHD	19	20626179	20715228	rs12610629	rs33948	13	89050	1	53.734	ZNF737(5570)	-0.40451	-0.62248	1.36637
IBG112498	4164	2	RD	19	20626179	20715228	rs12610629	rs33948	13	89050	1	47.483	ZNF737(5570)	-0.37679	-0.70098	0.11954
IBG113088	4485	2	ADHD	19	20626179	20715228	rs12610629	rs33948	13	89050	1	43.868	ZNF737(5570)	-0.31049	-0.3599	0.3298
IBG113389	5040	1	RD	19	20626179	20715228	rs12610629	rs33948	13	89050	1	34.918	ZNF737(5570)	-0.28264	-0.11935	-1.13007
IBG143457	3999	1	RD	19	20626179	20715228	rs12610629	rs33948	13	89050	1	48.836	ZNF737(5570)	-0.19854	-0.19775	-0.29683
IBG144899	4442	1	RD	19	20626179	20715228	rs12610629	rs33948	13	89050	1	54.854	ZNF737(5570)	-0.19086	-0.10881	-0.37892
IBG145360	4646	2	ADHD	19	20626179	20715228	rs12610629	rs33948	13	89050	1	55.036	ZNF737(5570)	-0.18193	-0.14705	0.12281
IBG145368	4646	2	ADHD	19	20626179	20715228	rs12610629	rs33948	13	89050	1	67.31	ZNF737(5570)	-0.16042	-0.22668	1.27426
IBG144308	4210	2	RD	19	20626179	20715228	rs12610629	rs33948	13	89050	1	34.89	ZNF737(5570)	-0.13453	0.11	-0.55355
IBG144897	4442	1	RD	19	20626179	20715228	rs12610629	rs33948	13	89050	1	64.096	ZNF737(5570)	-0.08862	0.23716	-0.12138
IBG1126361	4218	2	RD	19	20626179	20715228	rs12610629	rs33948	13	89050	1	44.441	ZNF737(5570)	-0.00483	-0.16653	-0.13237
IBG1453652	4646	1	ADHD	19	20626179	20715228	rs12610629	rs33948	13	89050	1	49.627	ZNF737(5570)	-0.00153	-0.15207	2.17489
IBG145188	4498	2	ADHD	19	20626179	20715228	rs12610629	rs33948	13	89050	1	52.218	ZNF737(5570)	0.06274	0.41788	1.17107
IBG113089	4485	1	ADHD	19	20626179	20715228	rs12610629	rs33948	13	89050	1	29.763	ZNF737(5570)	0.13776	0.30748	1.66863
IBG113118	4579	2	ADHD	19	20626179	20715228	rs12610629	rs33948	13	89050	1	45.745	ZNF737(5570)	0.16207	-0.0896	2.96355
IBG113388	5040	2	RD	19	20626179	20715228	rs12610629	rs33948	13	89050	1	28.735	ZNF737(5570)	0.21142	-0.27527	0.84667
IBG145109	4489	1	RD	19	20626179	20715228	rs12610629	rs33948	13	89050	1	57.099	ZNF737(5570)	0.27847	0.52301	0.08764
IBG140229	1200	1	RD	19	20626179	20715228	rs12610629	rs33948	13	89050	0	62.701	ZNF737(5570)	0.28113	0.33609	0.05649
IBG1427861	3518	2	RD	19	20626179	20715228	rs12610629	rs33948	13	89050	1	22.923	ZNF737(5570)	0.29032	-0.19636	0.90032
IBG113728	5507	2	RD	19	20626179	20715228	rs12610629	rs33948	13	89050	1	69.195	ZNF737(5570)	0.30114	0.65401	0.74073
IBG113899	5569	1	RD	19	20626179	20715228	rs12610629	rs33948	13	89050	1	26.977	ZNF737(5570)	0.34588	0.31959	0.61091
IBG112459	4153	1	RD	19	20626179	20715228	rs12610629	rs33948	13	89050	1	51.465	ZNF737(5570)	0.39147	0.0402	0.92069
IBG145107	4489	1	RD	19	20626179	20715228	rs12610629	rs33948	13	89050	1	42.528	ZNF737(5570)	0.42531	1.02192	-0.19406
IBG112799	4332	1	RD	19	20626179	20715228	rs12610629	rs33948	13	89050	1	29.51	ZNF737(5570)	0.47019	0.87722	0.78986
IBG143077	3598	1	ADHD	19	20626179	20715228	rs12610629	rs33948	13	89050	0	54.529	ZNF737(5570)	0.54112	0.59285	1.74051
IBG1457151	5275	1	RD	19	20626179	20715228	rs12610629	rs33948	13	89050	1	44.763	ZNF737(5570)	0.58235	0.204	1.46691
IBG1124561	4153	2	RD	19	20626179	20715228	rs12610629	rs33948	13	89050	1	27.981	ZNF737(5570)	0.60581	0.52536	0.6258
IBG1443361	4216	2	RD	19	20626179	20715228	rs12610629	rs33948	13	89050	1	50.709	ZNF737(5570)	0.60811	0.52766	1.25244
IBG112089	3904	1	RD	19	20626179	20715228	rs12610629	rs33948	13	89050	1	38.969	ZNF737(5570)	0.74217	0.58047	1.31655
IBG1434561	3999	2	RD	19	20626179	20715228	rs12610629	rs33948	13	89050	1	42.203	ZNF737(5570)	0.80408	0.53405	1.09466
IBG112258	3984	2	RD	19	20626179	20715228	rs12610629	rs33948	13	89050	1	36.261	ZNF737(5570)	0.84091	1.03128	1.60316
IBG143380	3972	2	RD	19	20626179	20715228	rs12610629	rs33948	13	89050	1	43.461	ZNF737(5570)	0.85684	1.23679	1.99102
IBG144840	4430	2	RD	19	20626179	20715228	rs12610629	rs33948	13	89050	1	48.748	ZNF737(5570)	0.90209	1.09246	1.24621
IBG1444751	4255	1	RD	19	20626179	20715228	rs12610629	rs33948	13	89050	1	53.853	ZNF737(5570)	0.98689	0.06689	2.36795
IBG1444451	4239	1	RD	19	20626179	20715228	rs12610629	rs33948	13	89050	1	37.227	ZNF737(5570)	1.08943	1.14439	1.91807
IBG1125951	4197	1	RD	19	20626179	20715228	rs12610629	rs33948	13	89050	1	21.114	ZNF737(5570)	1.10544	1.21457	2.28187
IBG113288	4858	2	ADHD	19	20626179	20715228	rs12610629	rs33948	13	89050	1	48.412	ZNF737(5570)	1.13921	1.0561	2.55981
IBG143610	4021	2	RD	19	20626179	20715228	rs12610629	rs33948	13	89050	1	53.201	ZNF737(5570)	1.20959	0.23543	2.57671
IBG145320	4589	2	RD	19	20626179	20715228	rs12610629	rs33948	13	89050	1	50.955	ZNF737(5570)	1.2108	1.69907	0.24744
IBG143858	4089	2	RD	19	20626179	20715228	rs12610629	rs33948	13	89050	1	46.274	ZNF737(5570)	1.30586	1.41499	2.60506
IBG142459	2867	1	RD	19	20626179	20715228	rs12610629	rs33948	13	89050	1	22.065	ZNF737(5570)	1.52203	1.44158	2.10609
IBG1120851	3904	1	RD	19	20626179	20715228	rs12610629	rs33948	13	89050	1	41.66	ZNF737(5570)	1.56175	1.07507	2.70212
IBG142567	2963	1	RD	19	20626179	20715228	rs12610629	rs33948	13	89050	1	45.423	ZNF737(5570)	1.60559	1.93137	1.71221
IBG112818	4346	2	RD	19	20626179	20715228	rs12610629	rs33948	13	89050	1	55.903	ZNF737(5570)	1.74284	1.63531	2.04498
IBG1443051	4210	1	RD	19	20626179	20715228	rs12610629	rs33948	13	89050	1	43.049	ZNF737(5570)	1.77388	1.17887	1.91295
IBG143850	4089	2	RD	19	20626179	20715228	rs12610629	rs33948	13	89050	1	50.618	ZNF737(5570)	1.78588	1.73251	2.44616
IBG1122551	3984	1	RD	19	20626179	20715228	rs12610629	rs33948	13	89050	1	47.126	ZNF737(5570)	1.97031	1.23989	3.45487
IBG1455761	5041	2	RD	19	20626179	20715228	rs12610629	rs33948	13	89050	1	56.21	ZNF737(5570)	1.99315	1.88562	2.11511
IBG144957	4453	1	RD	19	20626179	20715228	rs12610629	rs33948	13	89050	1	48.837	ZNF737(5570)	2.08612	2.14108	2.57568
IBG112478	4154	2	RD	19	20626179	20715228	rs12610629	rs33948	13	89050	1	45.318	ZNF737(5570)	2.12871	2.40032	2.05022
IBG112959	4437	1	RD	19	20626179	20715228	rs12610629	rs33948	13	89050	1	51.682	ZNF737(5570)	2.17464	2.14835	2.54008
IBG111768	2799	2	RD	19	20626179	20715228	rs12610629	rs33948	13	89050	1	47.113	ZNF737(5570)	-	-	0.98189
IBG111928	3519	2	RD	19	20626179	20715228	rs12610629	rs33948	13	89050	1	26.134	ZNF737(5570)	-	-	-0.1123
IBG111769	2799	1	RD	19	20626179	20715228	rs12610629	rs33948	13	89050	1	16.563	ZNF737(5570)	-	-	-0.89864
IBG111828	2856	2	RD	19	20630360	20715228	rs10408291	rs33948	12	84869	1	47.711	ZNF737(5570)	-0.43218	-0.13348	-0.52161
